# Supplementary material
Source: PubMed Central journal article supplement (PMC5777325)
Supplement: NIHMS934843-supplement-1.pdf [file NIHMS934843-supplement-1.pdf]

*unc-129<sup>prom</sup>::gfp*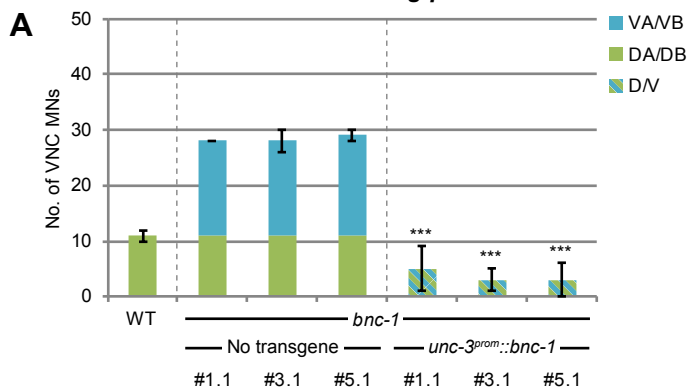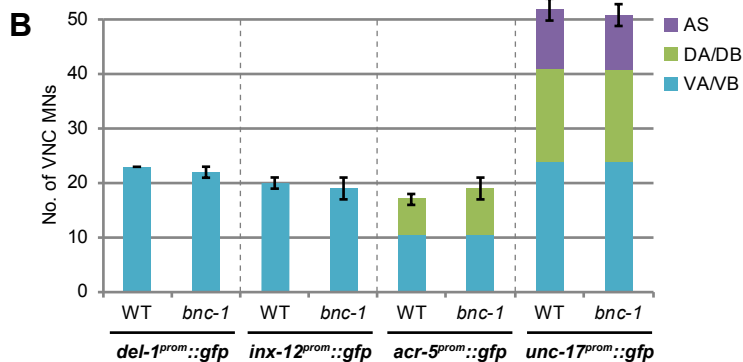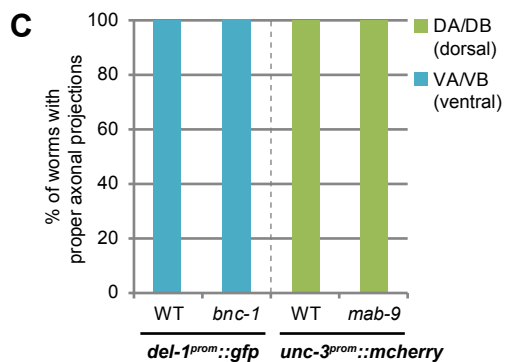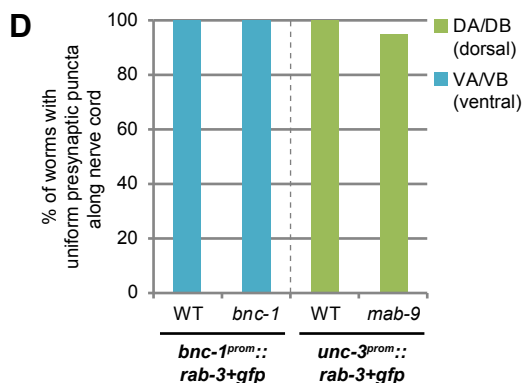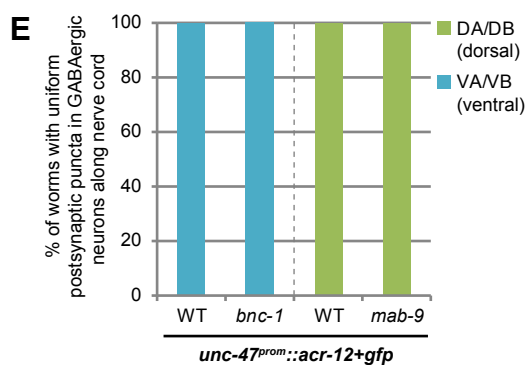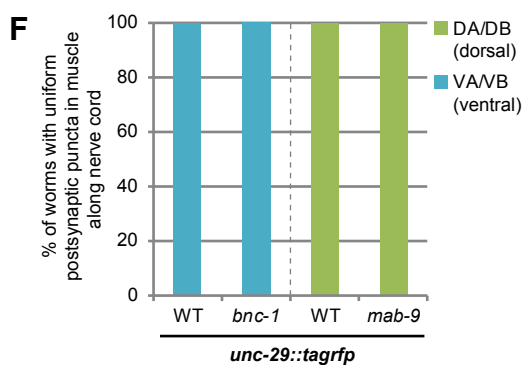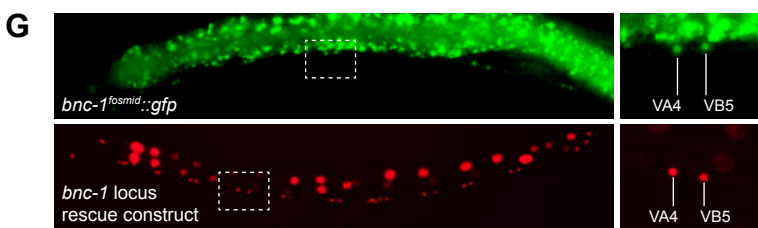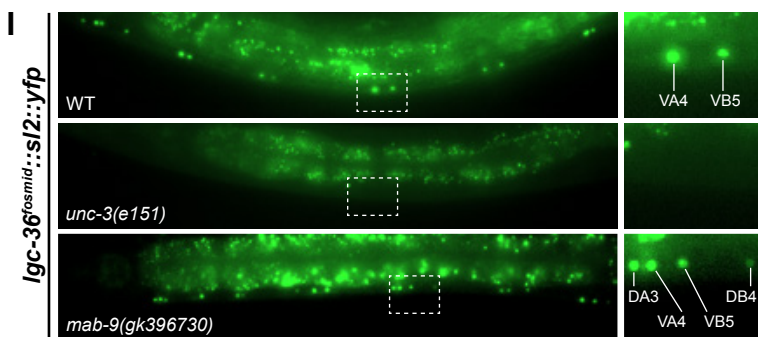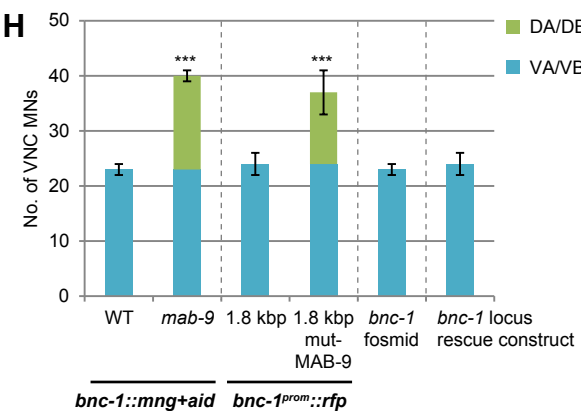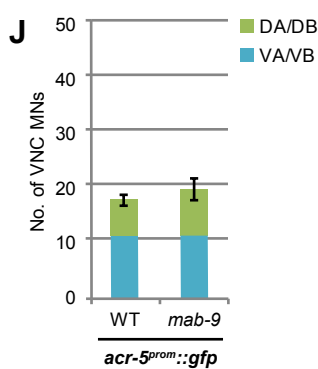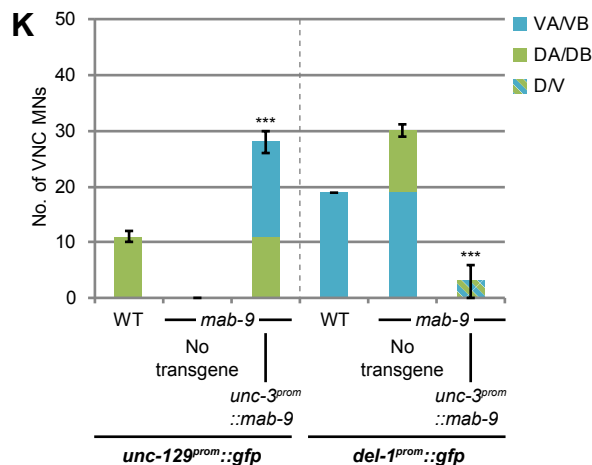

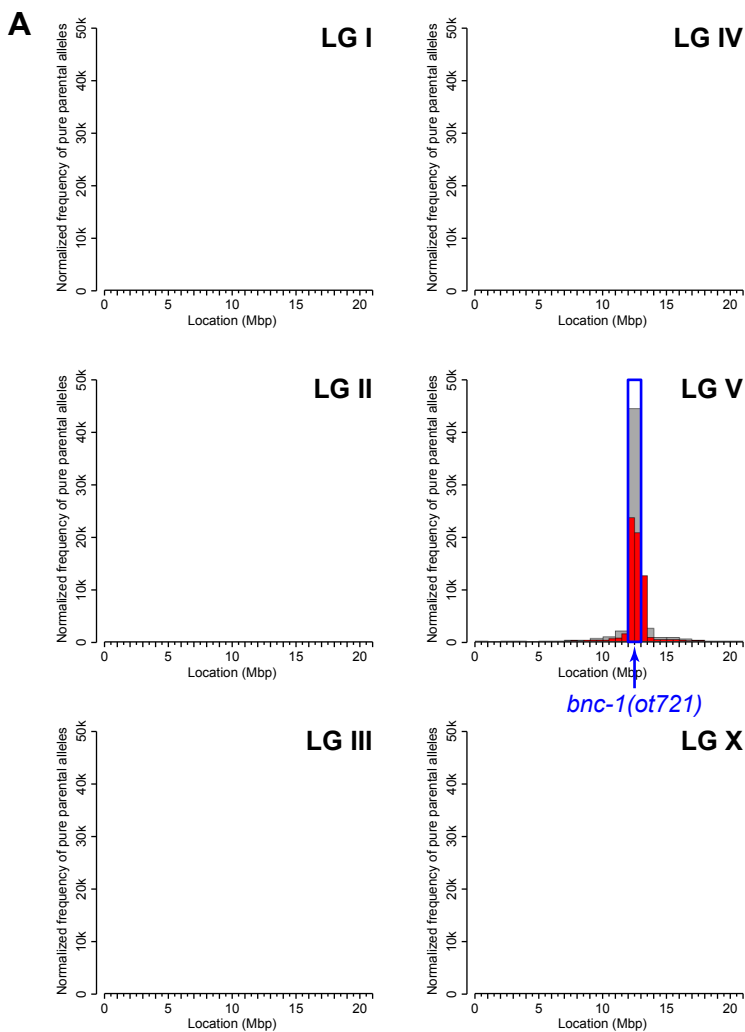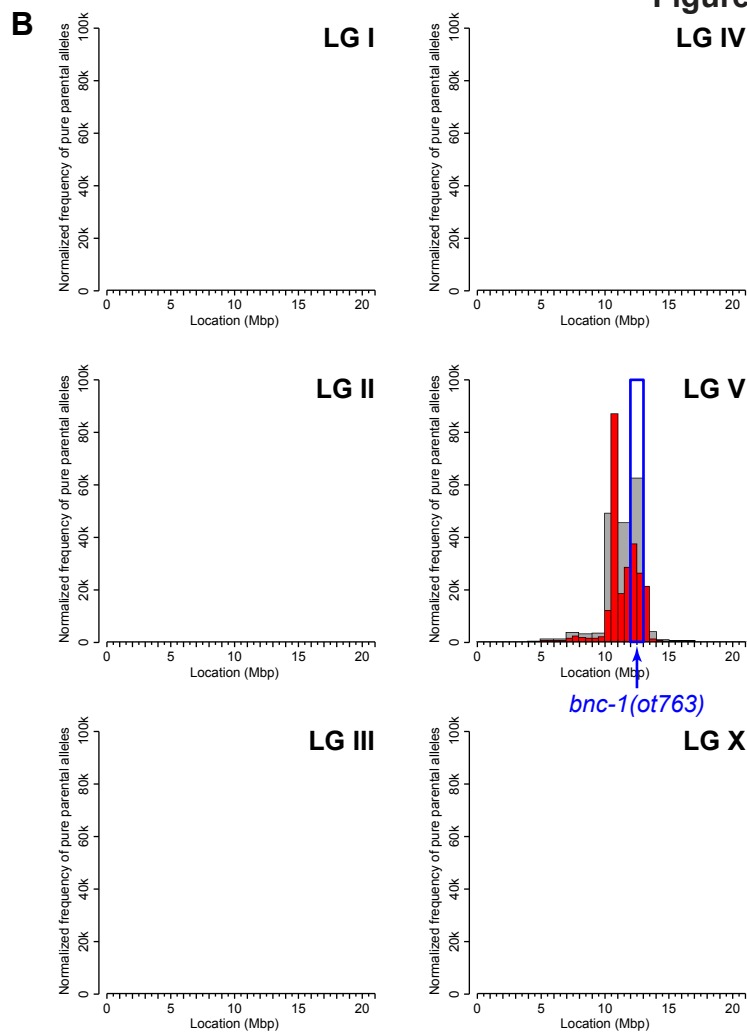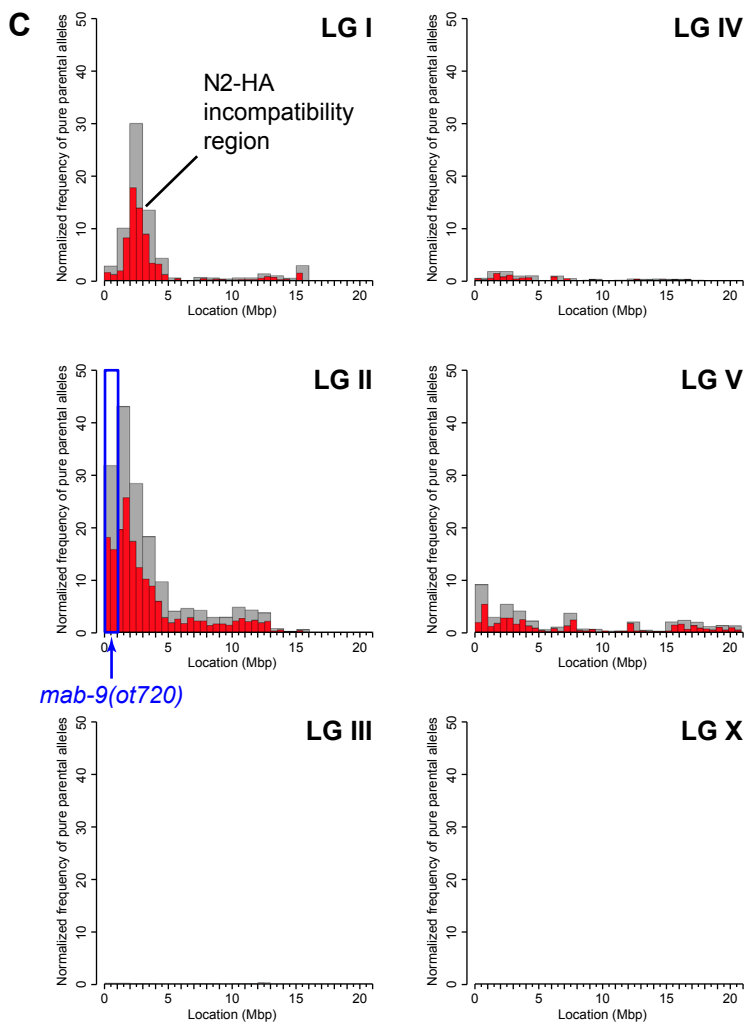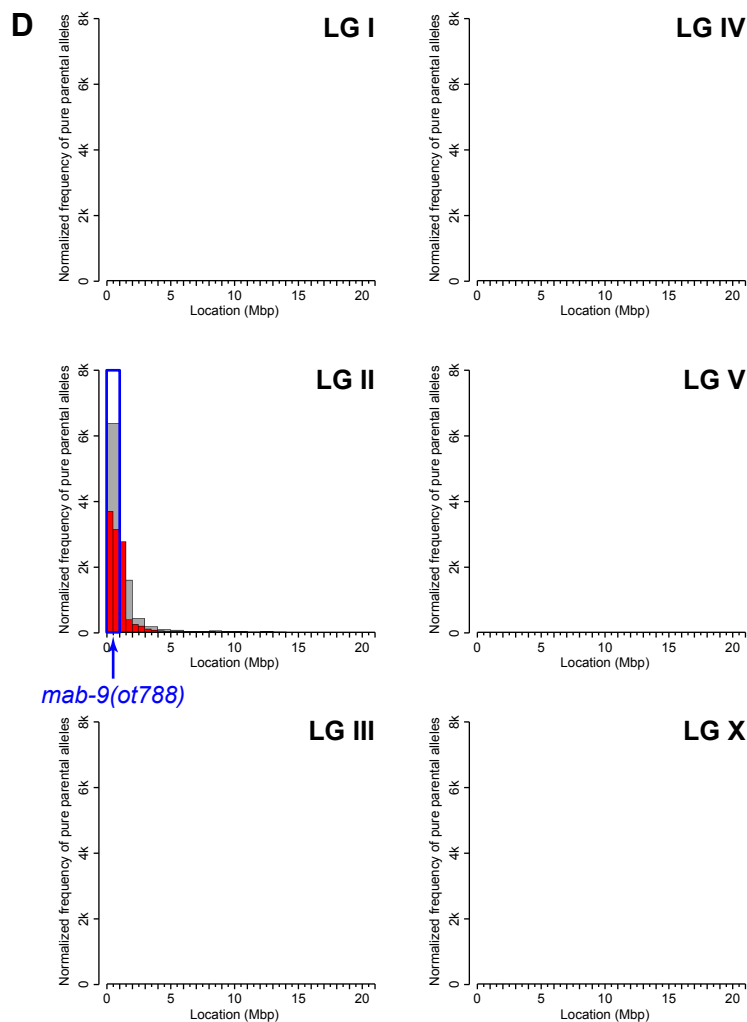

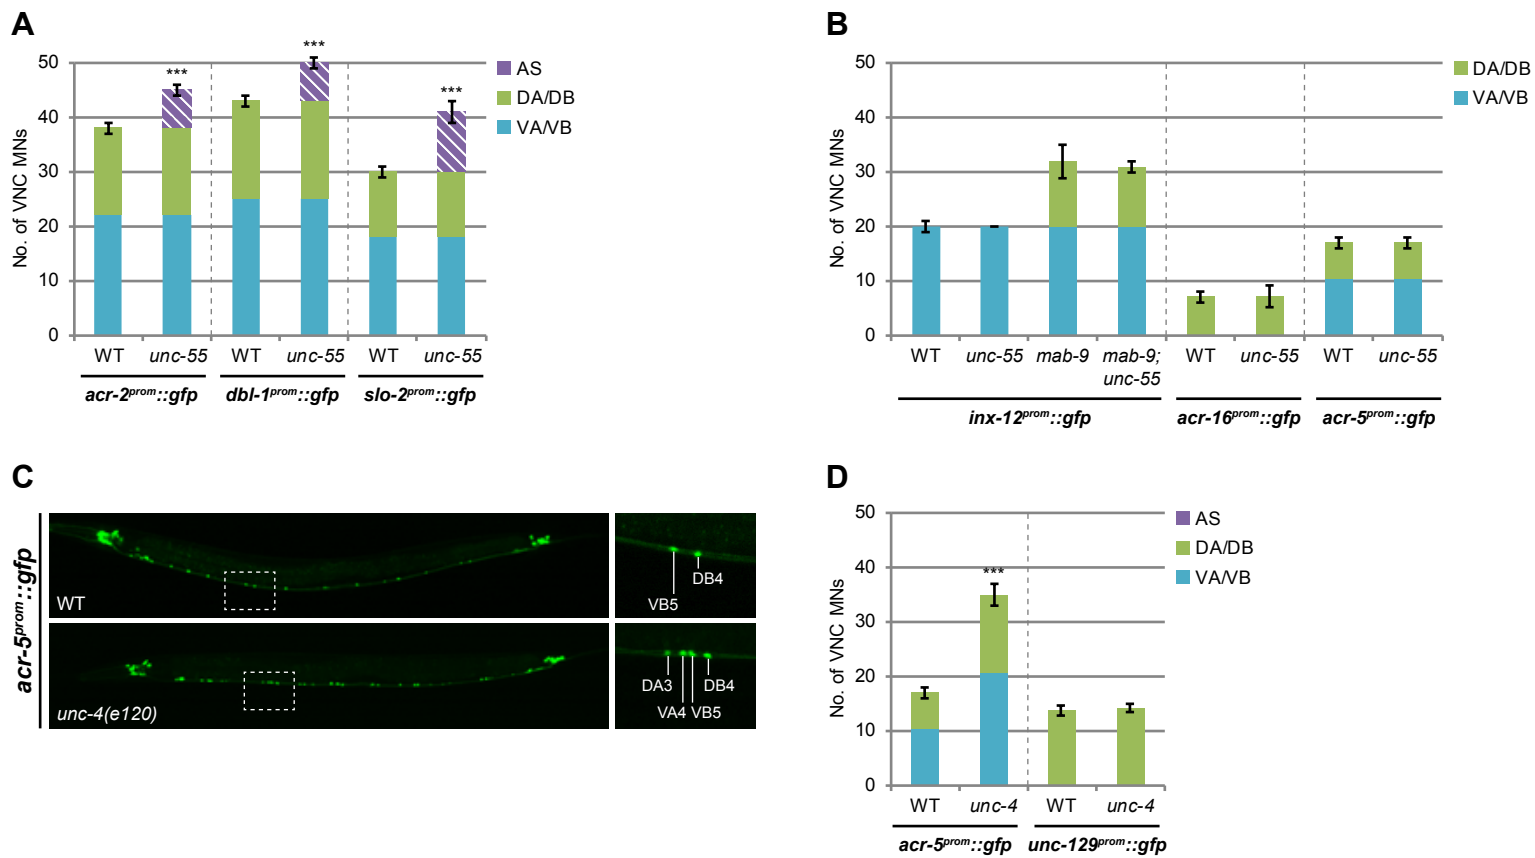

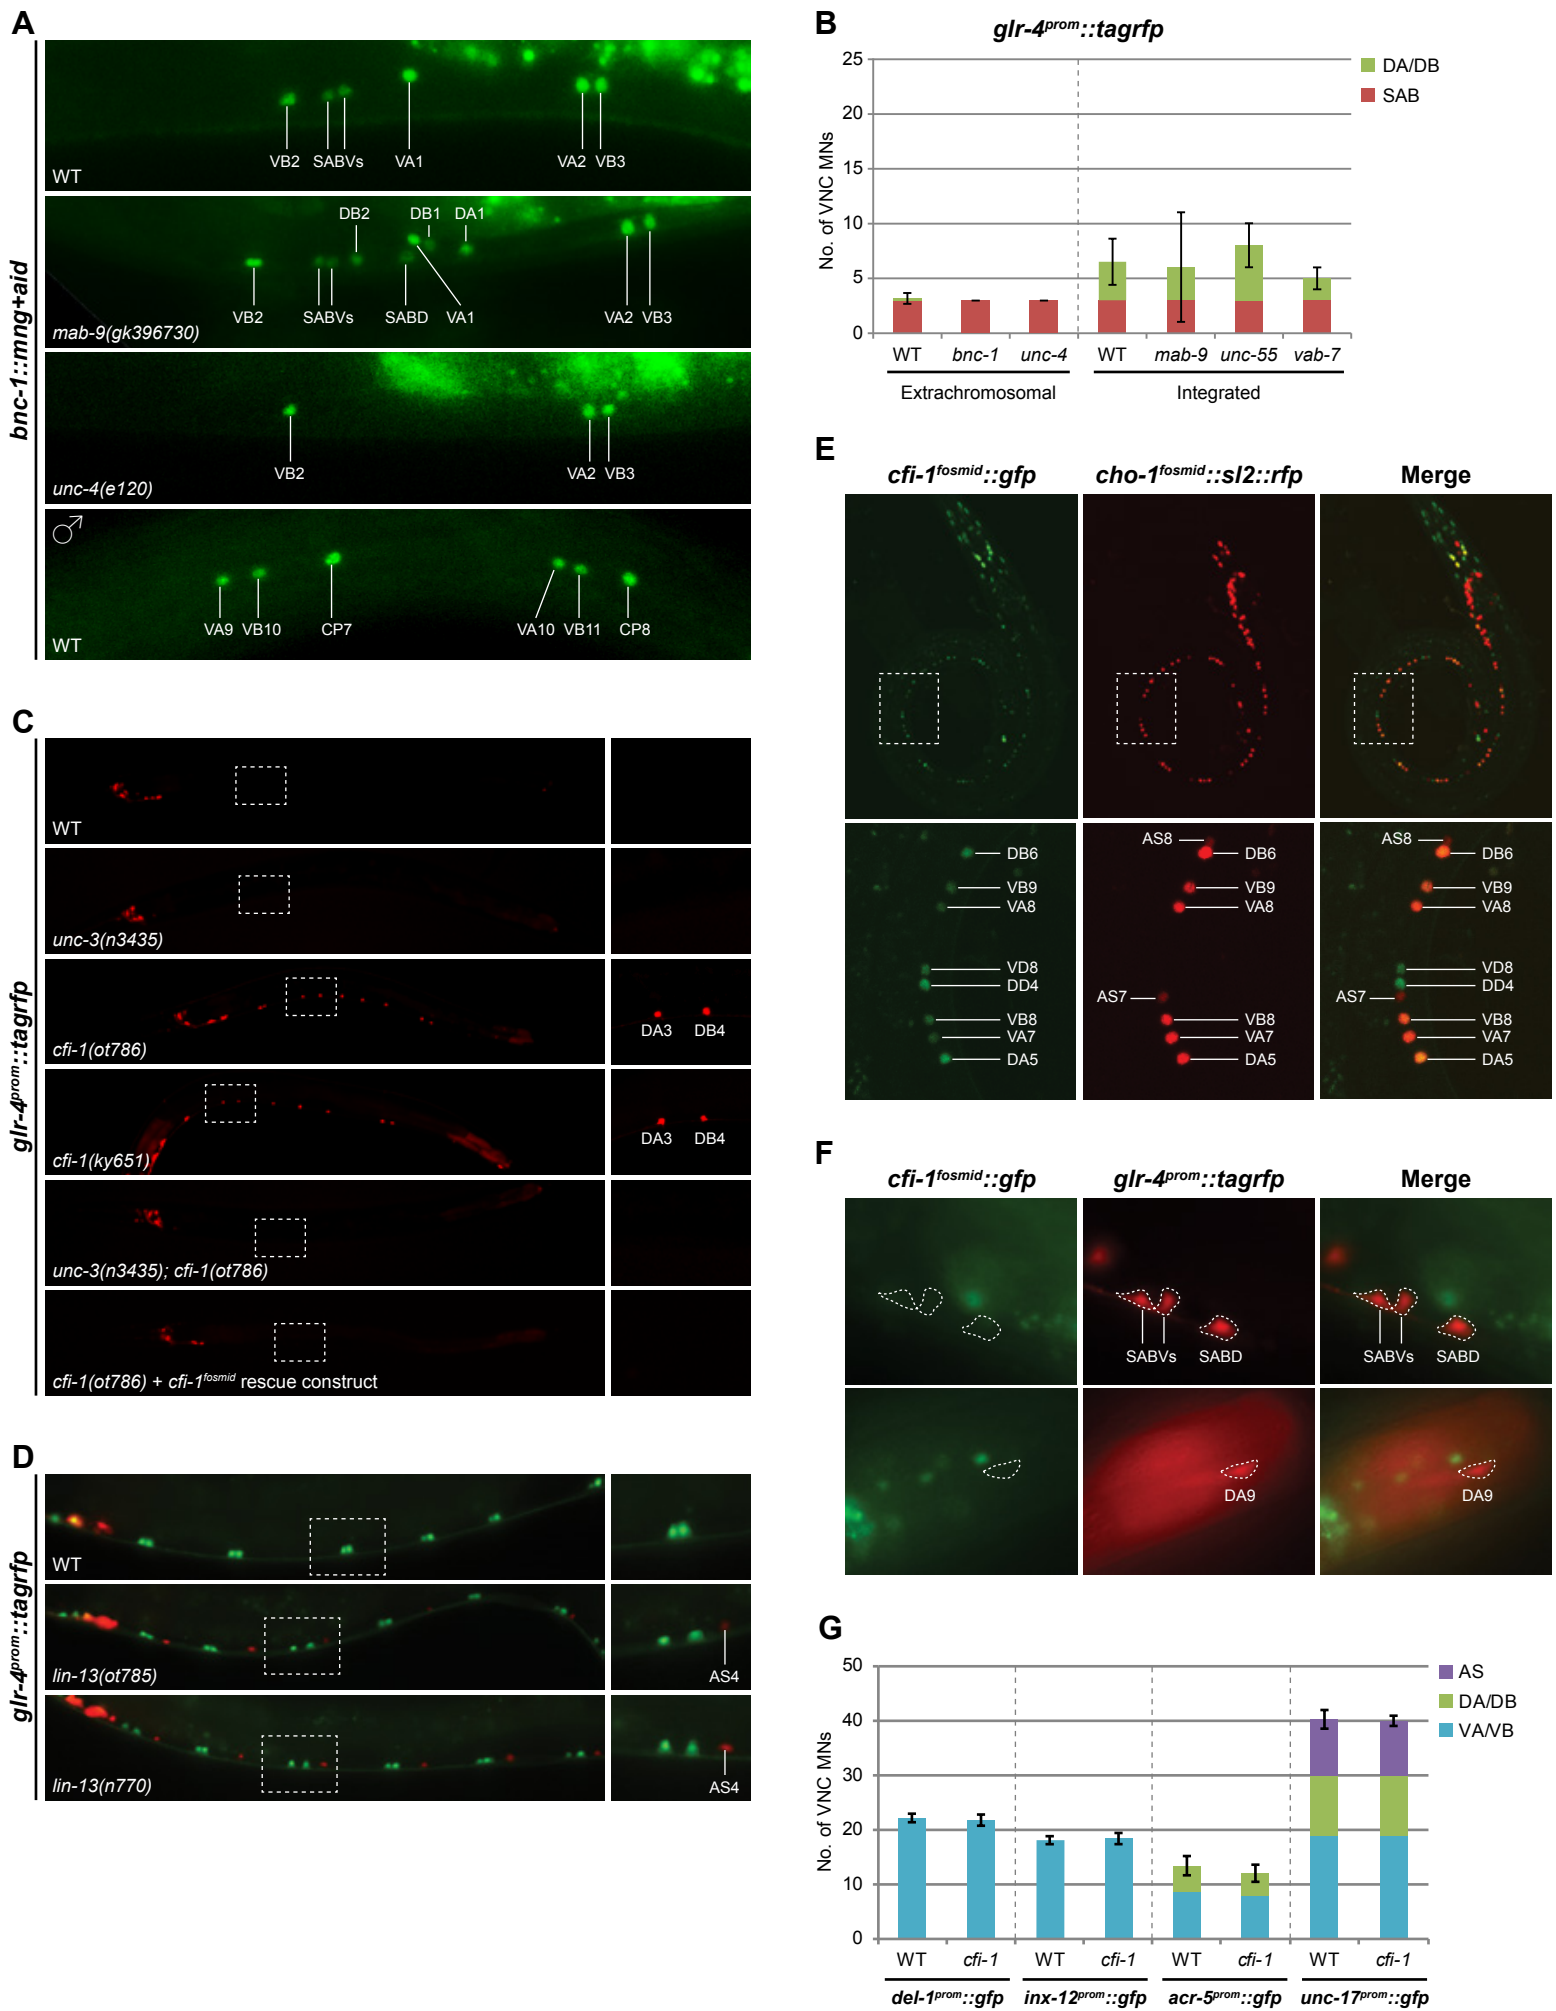

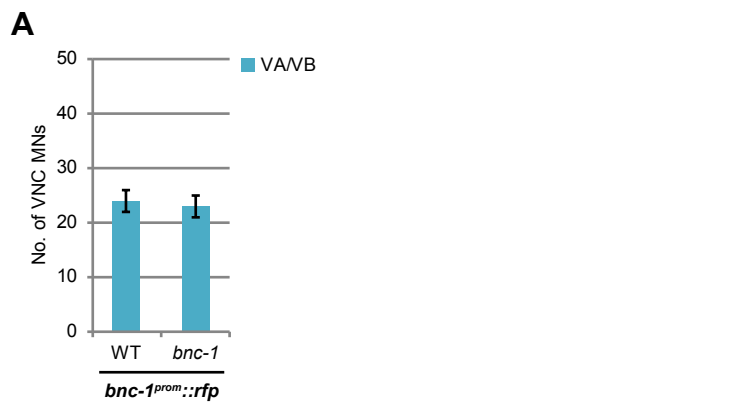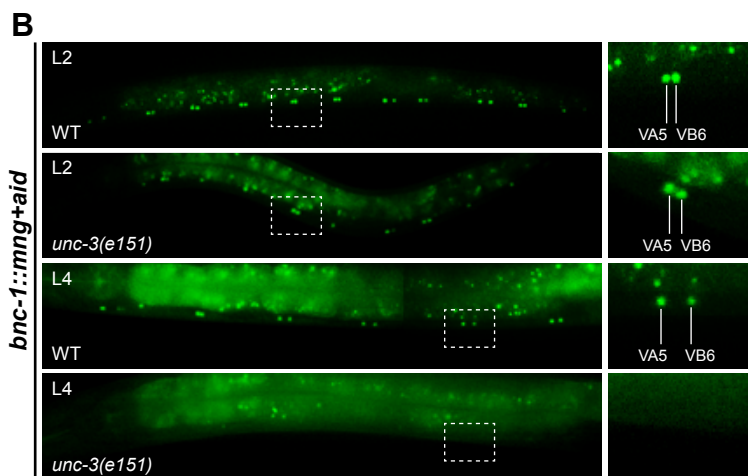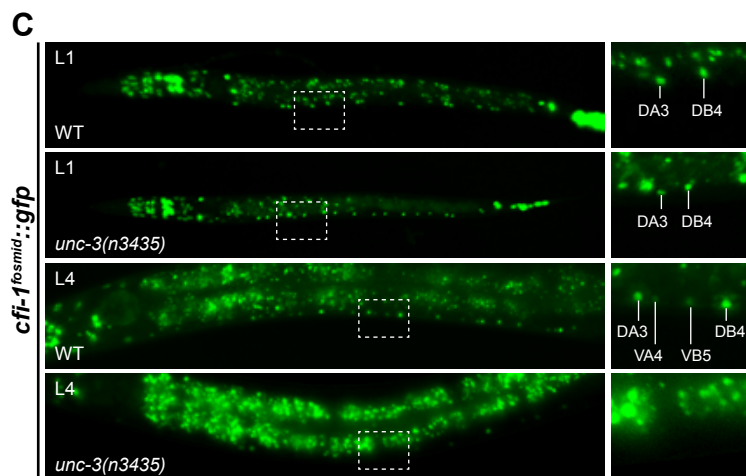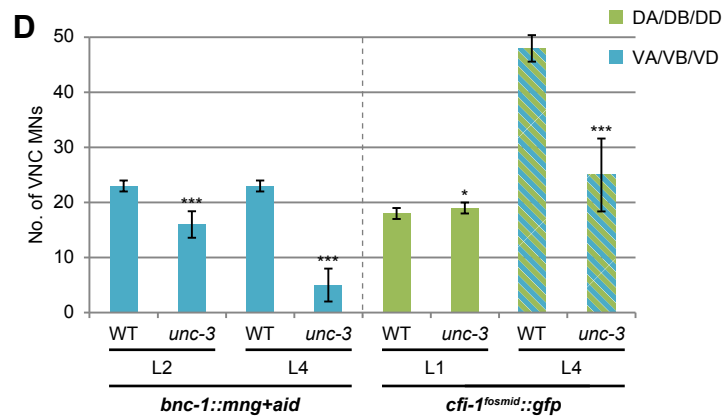

A

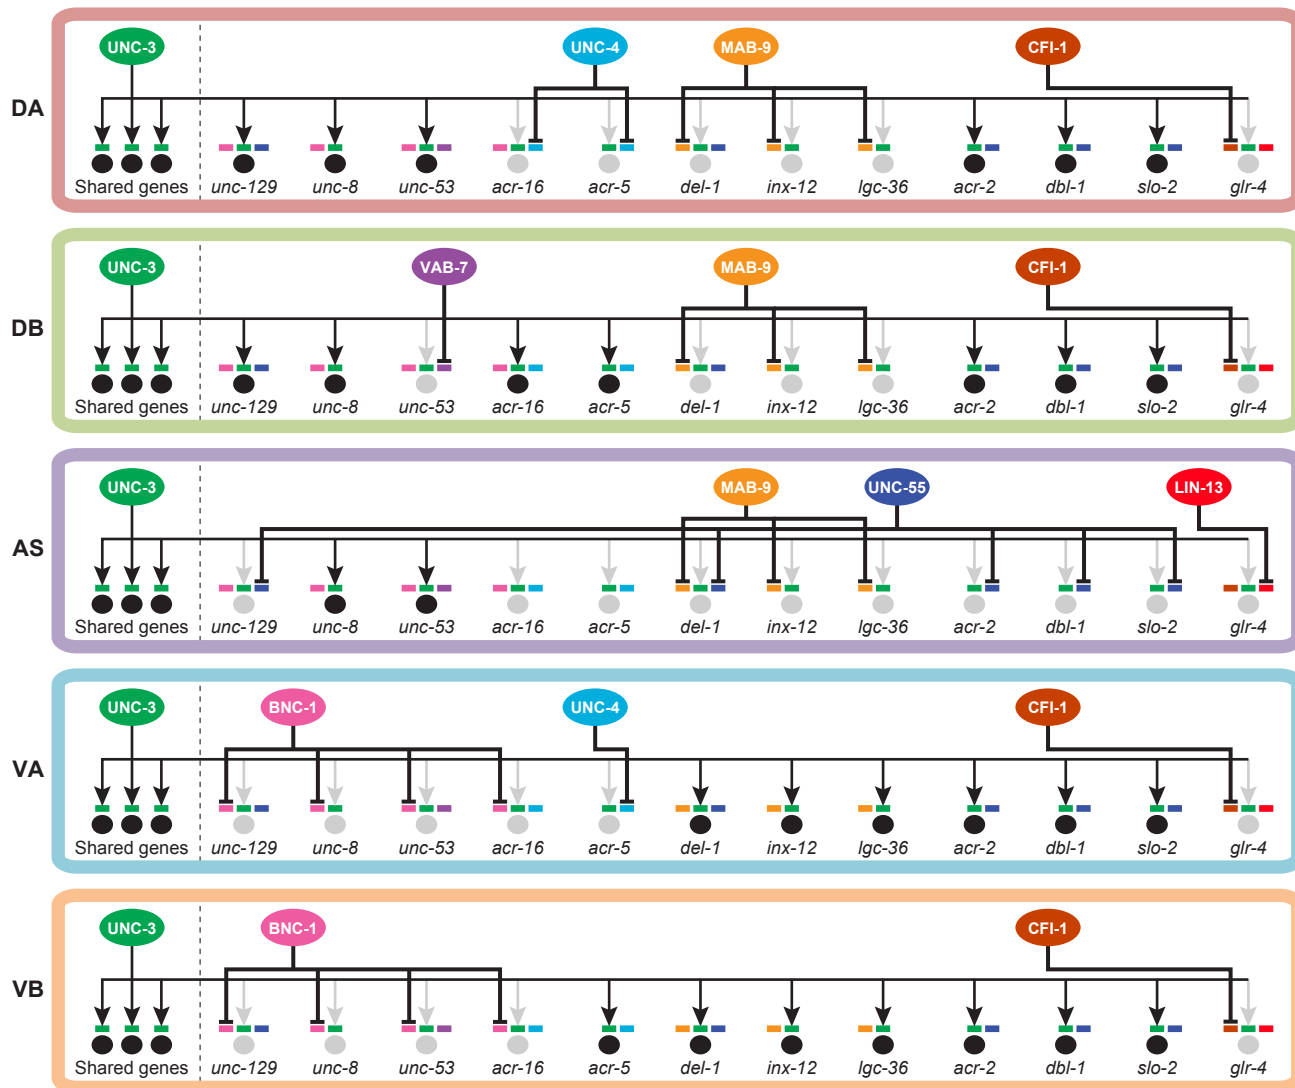

## SUPPLEMENTAL FIGURE LEGENDS

### Figure S1 (related to Fig.2,3): Additional characterization of *bnc-1* and *mab-9*

- A:** Quantification for **Fig.2F**; neurons in the RVG where this *unc-3* promoter expresses poorly were strictly excluded; error bars show SD. Identity of remaining VNC MNs where *unc-129* was not repressed by the *unc-3<sup>prom</sup>::bnc-1* transgene could not be unambiguously ascertained as their positions seemed random and were thus binned together as D/V. Three independent transgenic lines were assessed (#1.1, #3.1, and #5.1). Unpaired *t*-tests were performed comparing each line with its corresponding no-transgene control and WT; \*\*\* $p < 0.001$ ;  $n \geq 10$ .
- B:** The expression of VA/VB-specific *del-1* and *inx-12*, DB/VB-specific *acr-5*, and cholinergic *unc-17* is not affected in *bnc-1* null mutants. Error bars show SD;  $n \geq 13$ .
- C:** The axonal morphology of VA/VB (which project ventrally) and DA/DB MNs (which project dorsally) is unaffected in, respectively, *bnc-1* and *mab-9* null mutants when compared to WT worms. The fluorophores of the reporter transgenes fill up the neuronal processes, allowing the axonal projections to be visualized.  $n \geq 20$ .
- D:** The distribution of presynaptic puncta of VA/VB (along the VNC) and DA/DB MNs (along the dorsal nerve cord) is unaffected in, respectively, *bnc-1* and *mab-9* null mutants when compared to WT worms. RAB-3 (a member of the Ras GTPase superfamily) is a presynaptic molecule which when translationally fused with a fluorophore, allows for the visualization of the presynapse of a neuron in which it is expressed.  $n \geq 20$ .
- E:** In *C. elegans*, cholinergic MNs in the VNC are dyadic, as they synapse onto muscle as well as GABAergic MNs. The distribution of postsynaptic puncta in GABAergic MNs of synapses originating from VA/VB (along the VNC) and DA/DB MNs (along the dorsal nerve cord) is unaffected in, respectively, *bnc-1* and *mab-9* null mutants when compared to WT worms. ACR-12 (an nAChR subunit) is a postsynaptic molecule which when translationally fused with a fluorophore, allows for the visualization of the postsynapse of the neuron in which it is expressed. In this case, the *unc-47* promoter drives ACR-12 expression in GABAergic MNs. All worm strains here are in the genetic background of *acr-12(ok367)* which is required for ACR-12+GFP to be detectable.  $n \geq 20$ .
- F:** The distribution of postsynaptic puncta in neuromuscular junctions (NMJ) originating from VA/VB (along the VNC) and DA/DB MNs (along the dorsal nerve cord) is unaffected in, respectively, *bnc-1* and *mab-9* null mutants when compared to WT worms. Here, the

endogenous *unc-29* locus (encoding an nAChR subunit that is a body wall muscle-specific postsynaptic molecule) is translationally fused with TagRFP to allow for the visualization of NMJ postsynapses.  $n \geq 20$ .

- G:** VA/VB-specific expression of the *bnc-1* translationally tagged fosmid (very dim but consistent) and transcriptionally tagged rescue construct reporters (as mentioned in **Fig.3E**).
- H:** Quantification for **Fig.3E**; error bars show SD. Unpaired *t*-tests were performed compared to WT; \*\*\* $p < 0.001$ ;  $n \geq 13$ .
- I:** Images of the *unc-3*-dependent, VA/VB-specific *lgc-36* (Gendrel *et al.*, 2016) being derepressed in DA/DB MNs in *mab-9* null mutants as quantified in **Fig.3G**. Showing anterior half of worm.
- J:** The expression of DB/VB-specific *acr-5* is not affected in *mab-9* null mutants. Error bars show SD;  $n \geq 13$ .
- K:** Quantification for *unc-3<sup>prom</sup>::mab-9* transgenic line effect in **Fig.3A,F**; neurons in the RVG where this *unc-3* promoter expresses poorly were strictly excluded; error bars show SD. Identity of remaining VNC MNs where *del-1* was not repressed by the transgene could not be unambiguously ascertained as their positions seemed random and were thus binned together as D/V. At least two independent transgenic lines were assessed although only the most representative line is shown due to space constraints. Unpaired *t*-tests were performed comparing each line with its corresponding no-transgene control and WT; \*\*\* $p < 0.001$ ;  $n \geq 10$ .



**Figure S2 (related to Fig.2,3): Identification of *bnc-1* and *mab-9* alleles**

Hawaiian single nucleotide polymorphism (SNP) mapping plots obtained from whole-genome sequencing of the following repressor mutant alleles:

**A:** *bnc-1(ot721)*

**B:** *bnc-1(ot763)*

**C:** *mab-9(ot720)*

**D:** *mab-9(ot788)*

**Figure S3 (related to Fig.4): Additional characterization of *unc-55* and *unc-4***

**A:** Quantification for **Fig.4C**; error bars show SD. Unpaired *t*-tests were performed compared to WT; \*\*\* $p < 0.001$ ;  $n \geq 13$ .

**B:** The expression of VA/VB-specific *inx-12*, DB-specific *acr-16*, and DB/VB-specific *acr-5* is not affected in *unc-55* null mutants. Expression of *inx-12* is also not affected in *mab-9;unc-55* double mutants (in contrast to VA/VB-specific *del-1*). Error bars show SD;  $n \geq 13$ .

**C,D:** In *unc-4* null mutants, DB/VB-specific *acr-5* is derepressed in DA/VA MNs. On the other hand, the expression of DA/DB-specific *unc-129* is not affected in *unc-4* null mutants. Error bars show SD; unpaired *t*-tests were performed compared to WT; \*\*\* $p < 0.001$ ;  $n \geq 13$ .

**Figure S4 (related to Fig.5): Additional characterization of SAB motor neurons, *cfi-1* and *lin-13***

- A:** Besides VA/VB MNs, *bnc-1* is also expressed in the male-specific CP7 MN and CP8 interneuron in the VNC. Additionally, *bnc-1* is expressed dimly in SABVs in the RVG. In *mab-9* null mutants, *bnc-1* is derepressed in SABD. In *unc-4* null mutants, *bnc-1* in SABVs is lost, presumably due to the derepression of *mab-9* which otherwise represses *bnc-1* (see **Fig.5E** for genetic model).
- B:** The expression of SAB-specific *glr-4* is not affected in *bnc-1*, *unc-4*, *mab-9*, *unc-55*, and *vab-7* null mutants. The integrated strain (first shown in **Fig.5F**) is derived from the extrachromosomal strain (first shown in **Fig.6I**). Error bars show SD;  $n \geq 13$ .
- C:** Images of the SAB-specific *glr-4* being derepressed in DA/DB MNs in *cfi-1* null mutants in an *unc-3*-dependent manner as quantified in **Fig.5F**. That *glr-4* expression is largely absent from the VNC is independently corroborated by the translational reporter transgene *akEx32[glr-4::gfp]*. For the fosmid rescue experiment, three independent transgenic lines were assessed although only the most representative line is shown due to space constraints.
- D:** Images of the SAB-specific *glr-4* being derepressed in AS MNs in *lin-13* null mutants as quantified in **Fig.5F**. Due to its very broad expression and its colocalization and physical association with the *C. elegans* ortholog of heterochromatin protein 1 (HP1), *lin-13* is thought to be a general corepressor of gene expression (Coustham *et al.*, 2006; Grant *et al.*, 2010) and we did not pursue its characterization further.
- E:** *cfi-1* is expressed in DA/DB/VA/VB/DD/VD but not in AS MNs in the VNC.
- F:** *cfi-1* is also not expressed in SAB MNs in the RVG or in DA9 MNs in the preanal ganglion (PAG).
- G:** The expression of VA/VB-specific *del-1* and *inx-12*, DB/VB-specific *acr-5*, and cholinergic *unc-17* is not affected in *cfi-1* null mutants. For the latter three, MNs in the RVG and PAG were not quantified. Error bars show SD;  $n \geq 10$ .

**Figure S5 (related to Fig.7): *unc-3* maintains but does not initiate *bnc-1* and *cfi-1* expression**

- A:** The VA/VB-specific expression driven by the *bnc-1* promoter is not affected in *bnc-1* null mutants – indicating that *bnc-1* does not auto-regulate. Error bars show SD;  $n \geq 13$ .
- B:** In *unc-3* null mutants, the VA/VB-specific expression of *bnc-1* is observed (albeit less consistently) at the L2 stage but is lost by the L4 stage. This indicates a requirement of UNC-3 to postdevelopmentally maintain but not to initiate *bnc-1* expression. VA/VB MNs are generated at the late L1 stage. L4 WT image repeated from **Fig.2E**.
- C:** In *unc-3* null mutants compared to WT, *cfi-1* expression is observed in VNC MNs at the L1 stage but is considerably lost by the L4 stage. This indicates a requirement of UNC-3 to postdevelopmentally maintain but not to initiate *cfi-1* expression. Only DA/DB/DD MNs have been generated by the L1 stage while VA/VB/VD MNs are generated at the late L1 stage. The remaining VNC MNs in the *unc-3* mutant at the L4 stage are presumably the DD/VD MNs which do not express *unc-3*.
- D:** Quantification for **C** and **D**; error bars show SD. Unpaired *t*-tests were performed compared to WT; \*\*\* $p < 0.001$ ; \* $p < 0.05$ ;  $n \geq 13$ .
- Note: Worm strains of *unc-3(ot837)* crossed with *evls82B* or *wdls3* are slightly uncoordinated, a phenotype not observed in these strains by themselves.

**Figure S6 (related to Fig.8): Detailed model**

- A:** Model of neuron identity diversification (similar to **Fig.8B** but with results from this study incorporated) depicting the transcriptional activity of a broadly acting terminal selector (e.g. UNC-3 specifying cholinergic MNs) being counteracted upon by subtype-specific repressors (e.g. the repressors uncovered in this study) at the target effector gene level.

## **SUPPLEMENTARY TABLES**

**Table S1 (related to Fig.6 and Experimental Procedures): Transcription factor binding site prediction and mutation**

**Table S2 (related to Experimental Procedures): New transgenic alleles and information on their generation**

**Table S1 (related to Fig.6 and Experimental Procedures): Transcription factor binding site prediction and mutation**

| Transcription factor                  | Binding site consensus motif                                                        | Method and reference                         | Effector gene search target | Binding site sequence and mutation         | <i>Caenorhabditis</i> species conservation |
|---------------------------------------|-------------------------------------------------------------------------------------|----------------------------------------------|-----------------------------|--------------------------------------------|--------------------------------------------|
| <i>C. elegans</i><br>UNC-3            |    | Generated from Kratsios <i>et al.</i> (2011) | <i>acr-16</i>               | TCTCCAGAGG<br>↓<br>TGGCCAGAGG              | 3 other species                            |
| <i>C. elegans</i><br>BNC-1            |    | PBM;<br>Narasimhan <i>et al.</i> (2015)      | <i>unc-129</i>              | TGTCACCTT<br>↓<br>AAGAGCCTT                | 5 other species                            |
|                                       |                                                                                     |                                              | <i>acr-16</i>               | TGTCACCAG<br>↓<br>AAGAGCCAG                | 3 other species                            |
| <i>D. melanogaster</i><br>Mid (MAB-9) | DRRGTWBRARGCG<br>(allow 1 mismatch)                                                 | SELEX;<br>Najand <i>et al.</i> (2012)        | <i>bnc-1</i>                | AGGGTGTCTGAAGTG<br>↓<br>(24 bp deletion)   | 5 other species                            |
| <i>M. musculus</i><br>Tbx20 (MAB-9)   |    | PBM;<br>Weirauch <i>et al.</i> (2013)        |                             | GAAGTGTGAA<br>↓<br>(24 bp deletion)        | 5 other species                            |
| <i>H. sapiens</i><br>TBX20            |   | SELEX;<br>Jolma <i>et al.</i> (2013)         |                             | GGGTGTCTGAAGTGTGA<br>↓<br>(24 bp deletion) | 5 other species                            |
| <i>M. musculus</i><br>Tbx20           | AGGTGTGA<br>(allow 2 mismatches)                                                    | SELEX;<br>Macindoe <i>et al.</i> (2009)      | <i>del-1</i>                | (i) AAATGTGAAACG<br>↓<br>AAAACCCCTTT       | 3 other species                            |
| <i>M. musculus</i><br>Tbx20           |  | ChIP-seq;<br>Shen <i>et al.</i> (2011)       | <i>del-1</i>                | (ii) ACTTGATGAAAG<br>↓<br>ACTTCCCCCCC      | 0 other species                            |

|                                                               |                                                                                     |                                                  |                |                                        |                 |
|---------------------------------------------------------------|-------------------------------------------------------------------------------------|--------------------------------------------------|----------------|----------------------------------------|-----------------|
| <i>C. elegans</i><br>nuclear hormone<br>receptors<br>(UNC-55) | TGACCT<br>(allow 1 mismatch)                                                        | Reviewed in<br>Van Gilst<br><i>et al.</i> (2002) | <i>unc-129</i> | ATGTCACCTT<br>↓<br>TAAGAGCCTT          | 5 other species |
|                                                               |                                                                                     |                                                  | <i>del-1</i>   | (i) TGAACT<br>↓<br>CCCACT              | 2 other species |
|                                                               |                                                                                     |                                                  |                | (ii) TGCCCT<br>↓<br>TTTAAA             | 1 other species |
| <i>M. musculus</i><br>Nr2f1 (UNC-55)                          |    | PBM;<br>Weirauch<br><i>et al.</i> (2013)         | <i>del-1</i>   | (iii) GTGCCCTT<br>↓<br>GCAAAACT        | 0 other species |
|                                                               |                                                                                     |                                                  |                | (iv) ATGACCTG<br>↓<br>AGTTTTGG         | 0 other species |
| <i>M. musculus</i><br>Arid3a (CFI-1)                          |    | ChIP-seq;<br>Rhee <i>et al.</i><br>(2014)        | <i>glr-4</i>   | (i) ATTTTTAT<br>↓<br>(28 bp deletion)  | 3 other species |
| <i>C. elegans</i><br>CFI-1                                    |  | PBM;<br>Weirauch<br><i>et al.</i> (2014)         | <i>glr-4</i>   | (ii) TTTGATAT<br>↓<br>(8 bp deletion)  | 6 other species |
|                                                               |                                                                                     |                                                  |                | (iii) TTTGATTG<br>↓<br>(8 bp deletion) | 6 other species |
|                                                               |                                                                                     |                                                  |                | (iv) TTTGATTT<br>↓<br>(14 bp deletion) | 5 other species |

**Note:**

Red letters indicate mutated sequences. See **Table S2** for precise positions of deletion mutations.

## SUPPLEMENTAL EXPERIMENTAL PROCEDURES

### Mutant strains

The *C. elegans* mutant alleles <strain name> used in this study were: *unc-3(e151)* <CB151>, *unc-3(n3435)* <MT10785>, *unc-3(ot837[unc-3::mng+aid])* <OH13988>, *bnc-1(ot721)* <OH14045>, *bnc-1(ot763)* <OH14044>, *bnc-1(ot845[bnc-1::mng+aid])* <OH14070>, *mab-9(e2410)* <CB4605>, *mab-9(gk396730)* <VC20768>, *mab-9(ot720)* <OH11850>, *mab-9(ot788)* <OH12389>, *mab-9(ot863[mab-9::TagRFP+aid])* <OH14357>, *unc-55(e402)* <CB402>, *unc-55(e1170)* <CB1170>, *unc-55(ot718)* <OH11837>, *unc-4(e26)* <NC168>, *unc-4(e120)* <CB120>, *unc-4(e2322ts)* <NC37>, *vab-7(e1562)* <CB1562>, *cfi-1(ky651)* <OS122>, *cfi-1(ot786)* <OH12344>, *lin-13(n770)* <MT8838>, *lin-13(ot785)* <OH12343>, *acr-12(ok367)* <IZ1225>, and *unc-29(kr208[unc-29::TagRFP])* <OH12325>.

### Transgenic strains

The *C. elegans* transgenic alleles <strain name> used in this study that have been published were *evls82B[unc-129<sup>prom</sup>::gfp]* <OH4128>, *hdls1[unc-53<sup>prom</sup>::gfp]* <VH111>, *wdEx419[acr-16<sup>prom</sup>::gfp]* <NC972>, *wdls3[del-1<sup>prom</sup>::gfp]* <NC138>, *wdls6[del-1<sup>prom</sup>::gfp]* <NC190>, *zwEx112[inx-12<sup>prom</sup>::gfp]* <ZW292>, *otEx6844[lgc-36<sup>fosmid</sup>::sl2::yfp]* <OH14644>; *juls14[acr-2<sup>prom</sup>::gfp]* <CZ631>, *ctls43[dbl-1<sup>prom</sup>::gfp]* <BW1935>, *sEx10749[slo-2<sup>prom</sup>::gfp]* <BC10749>, *wdEx75[acr-5<sup>prom</sup>::gfp]* <NC216>, *akEx32[glr-4::gfp]* <VM141>, *otls476[glr-4<sup>prom</sup>::TagRFP]* <OH12052>, *vsIs48[unc-17<sup>prom</sup>::gfp]* <LX929>, *ieSi57[eft-3<sup>prom</sup>::tir1]* <CA1200>, *ufls92[unc-47<sup>prom</sup>::acr-12+gfp]* <IZ1225>, and *otls544[cho-1<sup>fosmid</sup>::sl2::rfp]* <OH12655>. See **Table S2** for new transgenic alleles used in this study with detailed information on their generation. The fosmid of clone WRM0624cC09 in which the *bnc-1* gene locus was translationally fused with green fluorescent protein (GFP) just before the stop codon was kindly provided by the *C. elegans* Transgenome Project (Sarov *et al.*, 2012). Recombineering of the fosmid clone WRM0614dC10 in which the *cfi-1* gene locus was translationally fused with GFP just before the stop codon was performed exactly as described in Tursun *et al.*, (2009).

## Forward genetic screens

EMS mutagenesis was separately performed on three fluorescent reporter strains: *evls82B[unc-129<sup>prom</sup>::gfp]*, *hdls1[unc-53<sup>prom</sup>::gfp]*, and *otls476[glr-4<sup>prom</sup>::TagRFP]*, before manually screening for changes in reporter expression in VNC MNs. Automated screening for loss of reporter expression in VNC MNs was also performed on *evls82B* using the Union Biometrica Copas Biosort system (Doitsidou *et al.*, 2008). To identify the causal genes of the mutant alleles obtained, Hawaiian single nucleotide polymorphism (SNP) mapping and whole-genome sequencing (Doitsidou *et al.*, 2010) were performed followed by data analysis using the CloudMap pipeline (Minevich *et al.*, 2012). In addition to those reported in the Results section, mutant alleles of the following genes were also identified: *unc-3(ot722)*, *unc-3(ot789)*, and *ref-2(ot762)*.

## Targeted genome modification

The CRISPR/Cas9-mediated modification of the genome to, separately, translationally fuse the *unc-3*, *bnc-1*, and *mab-9* gene loci with the fluorescent reporter mNeonGreen (mNG) followed by the auxin-inducible degron (AID) just before the stop codon was performed exactly as described in Dickinson *et al.*, 2015.

## Microscopy

Worms were anesthetized using 100 mM sodium azide (NaN<sub>3</sub>) and mounted on 5% agarose pads on glass slides. Images were acquired as Z-stacks of ~1 µm-thick slices with the Micro-Manager software (Edelstein *et al.*, 2010) using the Zeiss Axio Imager.Z1 automated fluorescence microscope. Images were reconstructed via maximum intensity Z-projection of 2-10 µm Z-stacks using the ImageJ software (Schneider *et al.*, 2012).



## SUPPLEMENTAL REFERENCES

Coustham, V., Bedet, C., Monier, K., Schott, S., Karali, M., and Palladino, F. (2006). The *C. elegans* HP1 homologue HPL-2 and the LIN-13 zinc finger protein form a complex implicated in vulval development. *Dev Biol* 297, 308-322.

Dickinson, D.J., Pani, A.M., Heppert, J.K., Higgins, C.D., and Goldstein, B. (2015). Streamlined Genome Engineering with a Self-Excising Drug Selection Cassette. *Genetics* 200, 1035-1049.

Doitsidou, M., Flames, N., Lee, A.C., Boyanov, A., and Hobert, O. (2008). Automated screening for mutants affecting dopaminergic-neuron specification in *C. elegans*. *Nat Methods* 5, 869-872.

Doitsidou, M., Poole, R.J., Sarin, S., Bigelow, H., and Hobert, O. (2010). *C. elegans* mutant identification with a one-step whole-genome-sequencing and SNP mapping strategy. *PLoS One* 5, e15435.

Edelstein, A., Amodaj, N., Hoover, K., Vale, R., and Stuurman, N. (2010). Computer control of microscopes using microManager. *Curr Protoc Mol Biol Chapter 14*, Unit14 20.

Gendrel, M., Atlas, E.G., and Hobert, O. (2016). A cellular and regulatory map of the GABAergic nervous system of *C. elegans*. *Elife* 5.

Grant, J., Verrill, C., Coustham, V., Arneodo, A., Palladino, F., Monier, K., and Khalil, A. (2010). Perinuclear distribution of heterochromatin in developing *C. elegans* embryos. *Chromosome Res* 18, 873-885.

Jolma, A., Yan, J., Whittington, T., Toivonen, J., Nitta, K.R., Rastas, P., Morgunova, E., Enge, M., Taipale, M., Wei, G., *et al.* (2013). DNA-binding specificities of human transcription factors. *Cell* 152, 327-339.

Macindoe, I., Glockner, L., Vukasin, P., Stennard, F.A., Costa, M.W., Harvey, R.P., Mackay, J.P., and Sunde, M. (2009). Conformational stability and DNA binding specificity of the cardiac T-box transcription factor Tbx20. *J Mol Biol* 389, 606-618.

Minevich, G., Park, D.S., Blankenberg, D., Poole, R.J., and Hobert, O. (2012). CloudMap: a cloud-based pipeline for analysis of mutant genome sequences. *Genetics* 192, 1249-1269.

Najand, N., Ryu, J.R., and Brook, W.J. (2012). In vitro site selection of a consensus binding site for the *Drosophila melanogaster* Tbx20 homolog midline. *PLoS One* 7, e48176.

Narasimhan, K., Lambert, S.A., Yang, A.W., Riddell, J., Mnaimneh, S., Zheng, H., Albu, M., Najafabadi, H.S., Reece-Hoyes, J.S., Fuxman Bass, J.I., *et al.* (2015). Mapping and analysis of *Caenorhabditis elegans* transcription factor sequence specificities. *Elife* 4.

Rhee, C., Lee, B.K., Beck, S., Anjum, A., Cook, K.R., Popowski, M., Tucker, H.O., and Kim, J. (2014). Arid3a is essential to execution of the first cell fate decision via direct embryonic and extraembryonic transcriptional regulation. *Genes Dev* 28, 2219-2232.

Sarov, M., Murray, J.I., Schanze, K., Pozniakovski, A., Niu, W., Angermann, K., Hasse, S., Rupprecht, M., Vinis, E., Tinney, M., *et al.* (2012). A genome-scale resource for in vivo tag-based protein function exploration in *C. elegans*. *Cell* 150, 855-866.

Schneider, C.A., Rasband, W.S., and Eliceiri, K.W. (2012). NIH Image to ImageJ: 25 years of image analysis. *Nat Methods* 9, 671-675.

Shen, T., Aneas, I., Sakabe, N., Dirschinger, R.J., Wang, G., Smemo, S., Westlund, J.M., Cheng, H., Dalton, N., Gu, Y., *et al.* (2011). Tbx20 regulates a genetic program essential to adult mouse cardiomyocyte function. *J Clin Invest* 121, 4640-4654.

Tursun, B., Cochella, L., Carrera, I., and Hobert, O. (2009). A toolkit and robust pipeline for the generation of fosmid-based reporter genes in *C. elegans*. *PLoS One* 4, e4625.

Van Gilst, M., Gissendanner, C.R., and Sluder, A.E. (2002). Diversity and function of orphan nuclear receptors in nematodes. *Crit Rev Eukaryot Gene Expr* 12, 65-88.

Weirauch, M.T., Cote, A., Norel, R., Annala, M., Zhao, Y., Riley, T.R., Saez-Rodriguez, J., Cokelaer, T., Vedenko, A., Talukder, S., *et al.* (2013). Evaluation of methods for modeling transcription factor sequence specificity. *Nat Biotechnol* 31, 126-134.
